# Supplementary material for: Bottom-up effects on herbivore-induced plant defences: a case study based on compositional patterns of rhizosphere microbial communities
Source: PubMed Central journal article supplement (PMC5524984; doi:10.1038/s41598-017-06714-x), 2017-07-24

## Bottom-up effects on herbivore-induced plant defences: a case study based on compositional patterns of rhizosphere microbial communities

Emilio Benítez, Daniel Paredes, Estefanía Rodríguez, Diana Aldana, Mónica González, Rogelio Nogales, Mercedes Campos, Beatriz Moreno

**Supplementary Table S1.** Chemical parameters of potting soil initially containing a sterile (Control)/non sterile (Vermicompost) inoculum.

|                           | Control | Vermicompost |
|---------------------------|---------|--------------|
| Al (mg kg <sup>-1</sup> ) | 11158   | 11440        |
| As (mg kg <sup>-1</sup> ) | 1.40    | 1.31         |
| Ca (g kg <sup>-1</sup> )  | 89.48   | 89.28        |
| Cd (mg kg <sup>-1</sup> ) | n.d.    | n.d.         |
| Co (mg kg <sup>-1</sup> ) | n.d.    | n.d.         |
| Cr (mg kg <sup>-1</sup> ) | 19.02   | 20.06        |
| Cu (mg kg <sup>-1</sup> ) | 16.76   | 19.16        |
| Fe (mg kg <sup>-1</sup> ) | 6361    | 6558         |
| Hg (mg kg <sup>-1</sup> ) | n.d.    | n.d.         |
| K (g kg <sup>-1</sup> )   | 3.84    | 4.12         |
| Li (mg kg <sup>-1</sup> ) | 7.78    | 8.07         |
| Mg (mg kg <sup>-1</sup> ) | 6538    | 6636         |
| Mn (mg kg <sup>-1</sup> ) | 238     | 237          |
| Mo (mg kg <sup>-1</sup> ) | n.d.    | n.d.         |
| Na (mg kg <sup>-1</sup> ) | 320     | 393          |
| Ni (mg kg <sup>-1</sup> ) | 14.42   | 13.93        |
| P (g kg <sup>-1</sup> )   | 1.19    | 1.28         |
| Pb (mg kg <sup>-1</sup> ) | 6.99    | 5.46         |
| S (mg kg <sup>-1</sup> )  | 659     | 882          |
| Se (mg kg <sup>-1</sup> ) | n.d.    | n.d.         |
| Si (mg kg <sup>-1</sup> ) | 3390    | 4161         |
| Ti (mg kg <sup>-1</sup> ) | 578     | 618          |
| V (mg kg <sup>-1</sup> )  | 16.50   | 17.57        |
| Zn(mg kg <sup>-1</sup> )  | 29.80   | 33.37        |
| N (g kg <sup>-1</sup> )   | 2.4     | 2.6          |
| SOC (g kg <sup>-1</sup> ) | 25.7    | 28.3         |
| C:N                       | 10.7    | 10.9         |

n.d.: not detected

**Supplementary Fig. S1.** Krona chart of the total bacteria represented by 16S rRNA gene sequences recovered from soil initially containing a sterile (Control)/non sterile (Vermicompost) inoculum.

## Control

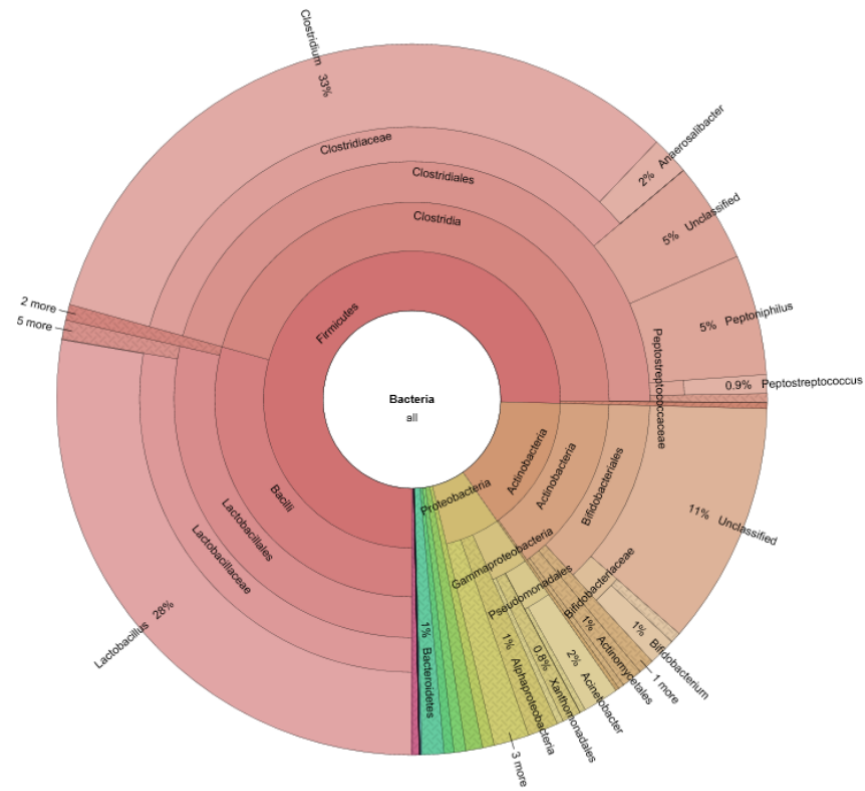

## Vermicompost

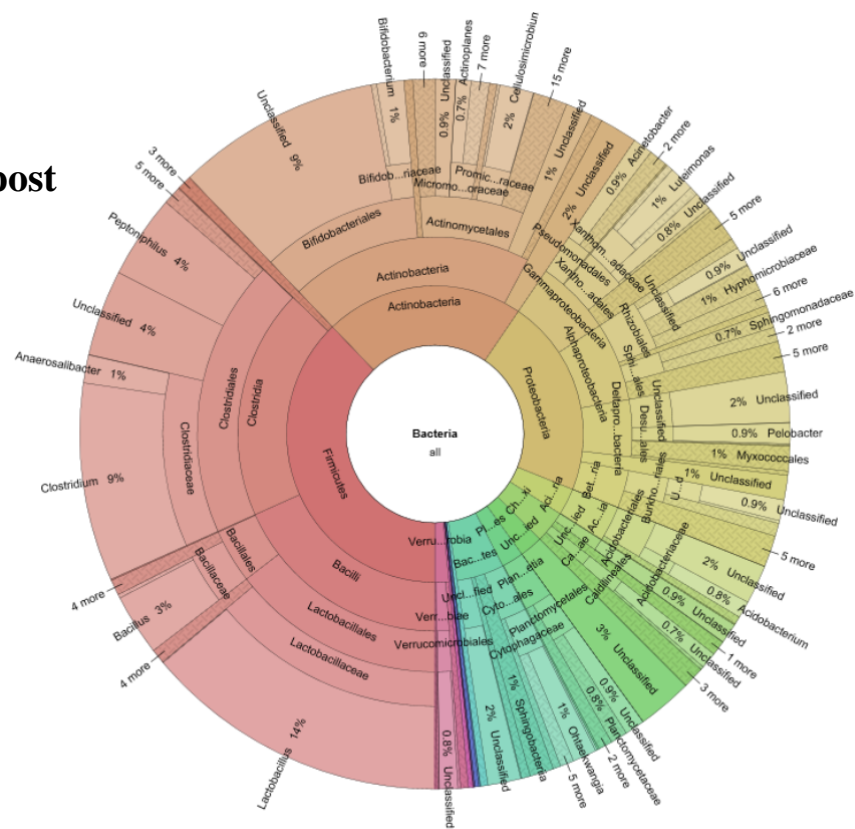

**Supplementary Fig. S2.** Krona chart of the active bacteria represented by 16S rRNA transcripts sequences recovered from soil initially containing a sterile (Control)/non sterile (Vermicompost) inoculum.

**Control**

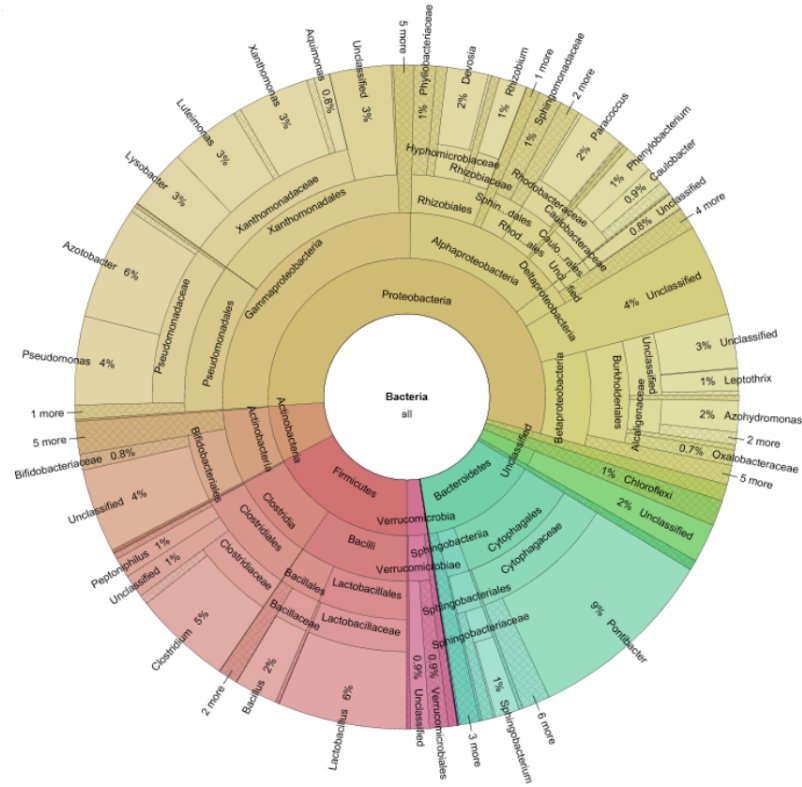

**Vermicompost**

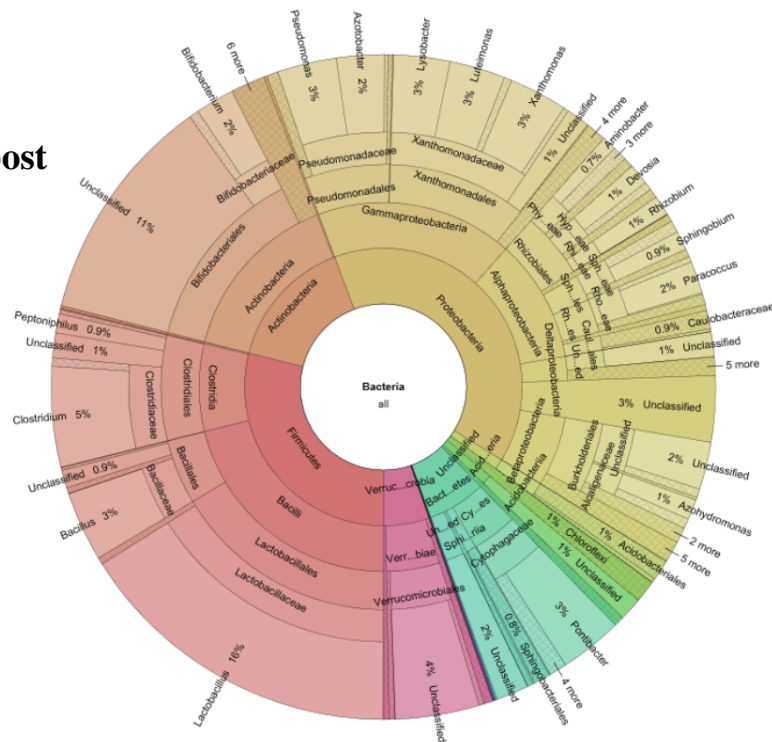



# Control

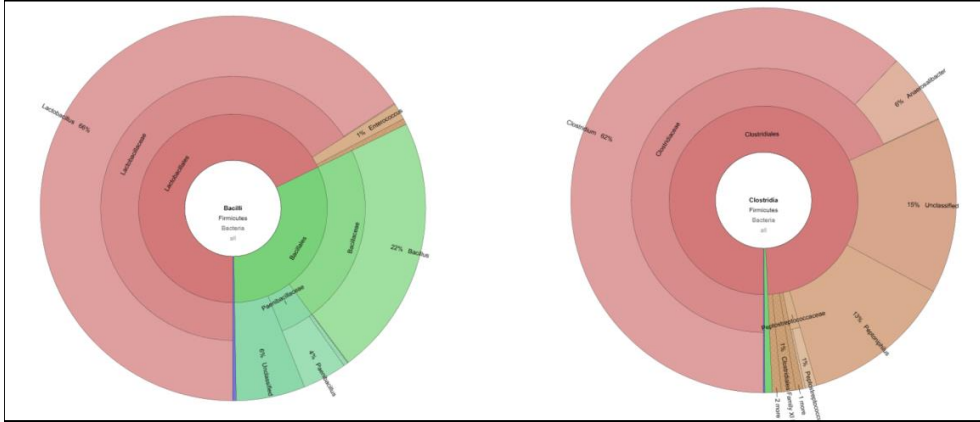

# Vermicompost

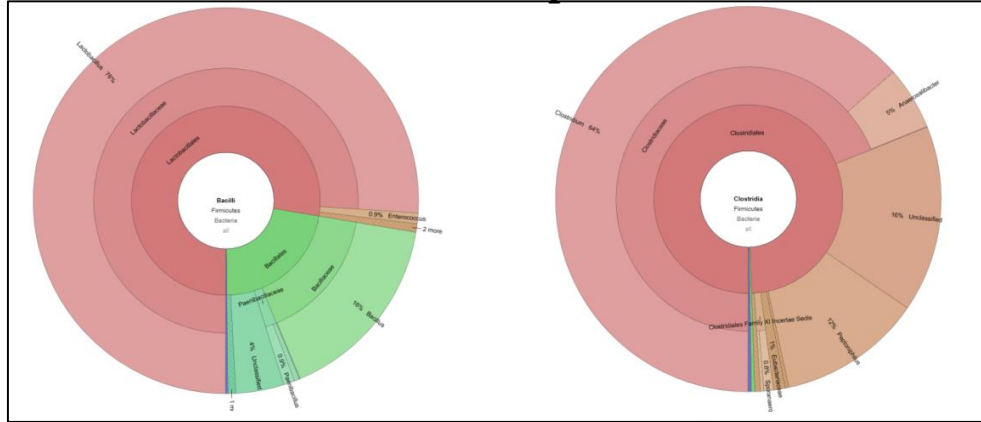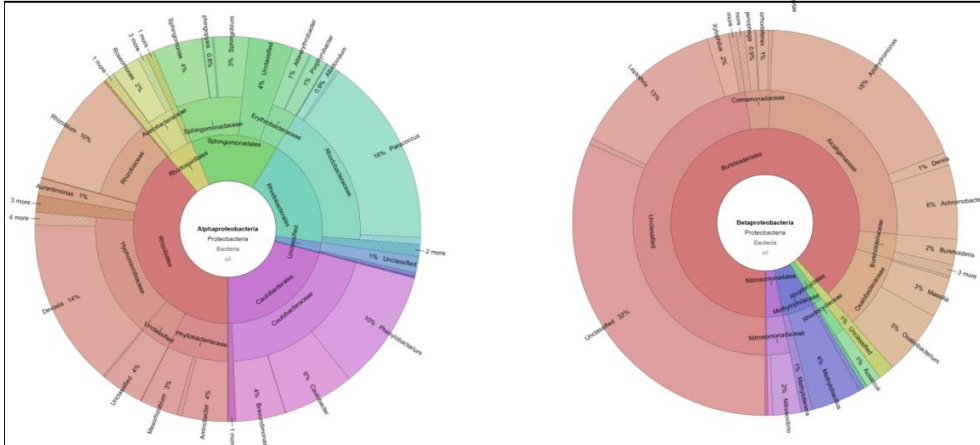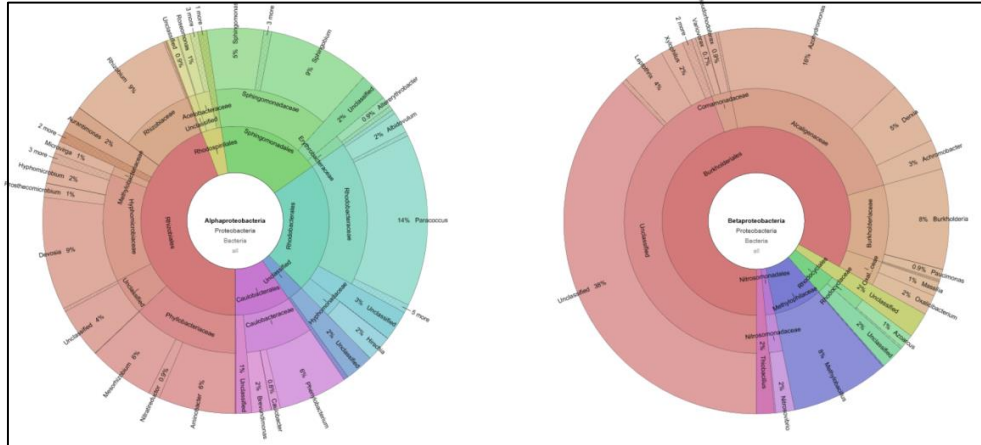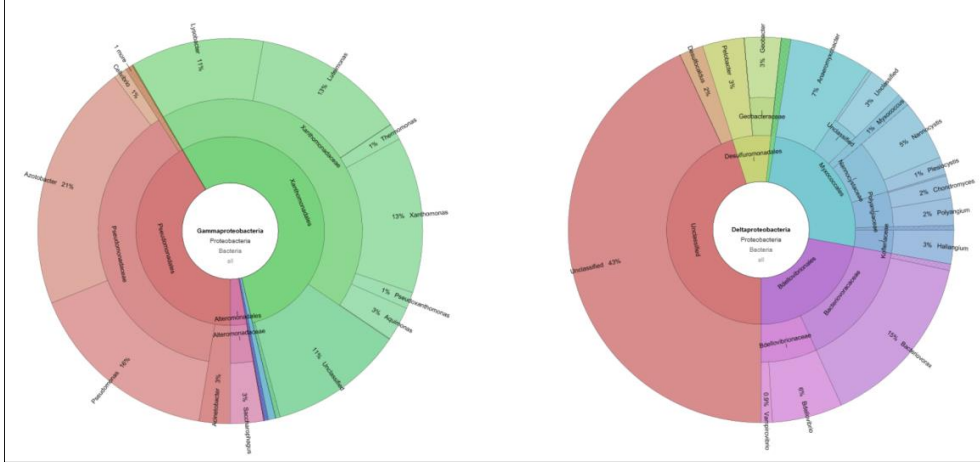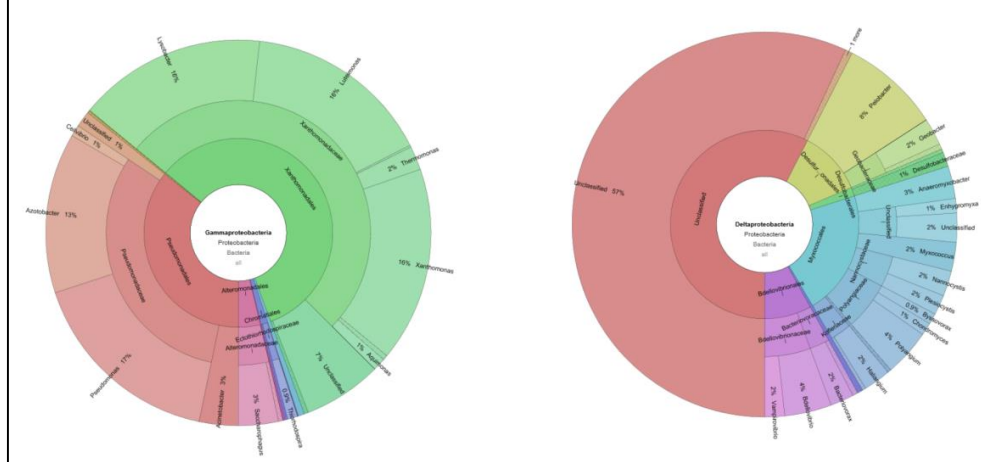

**Supplementary Fig. S4.** Rarefaction curves and alpha diversity values of 16S rRNA sequences recovered from soil initially containing a sterile (Control)/non sterile (Vermicompost) inoculum at both DNA and RNA levels.

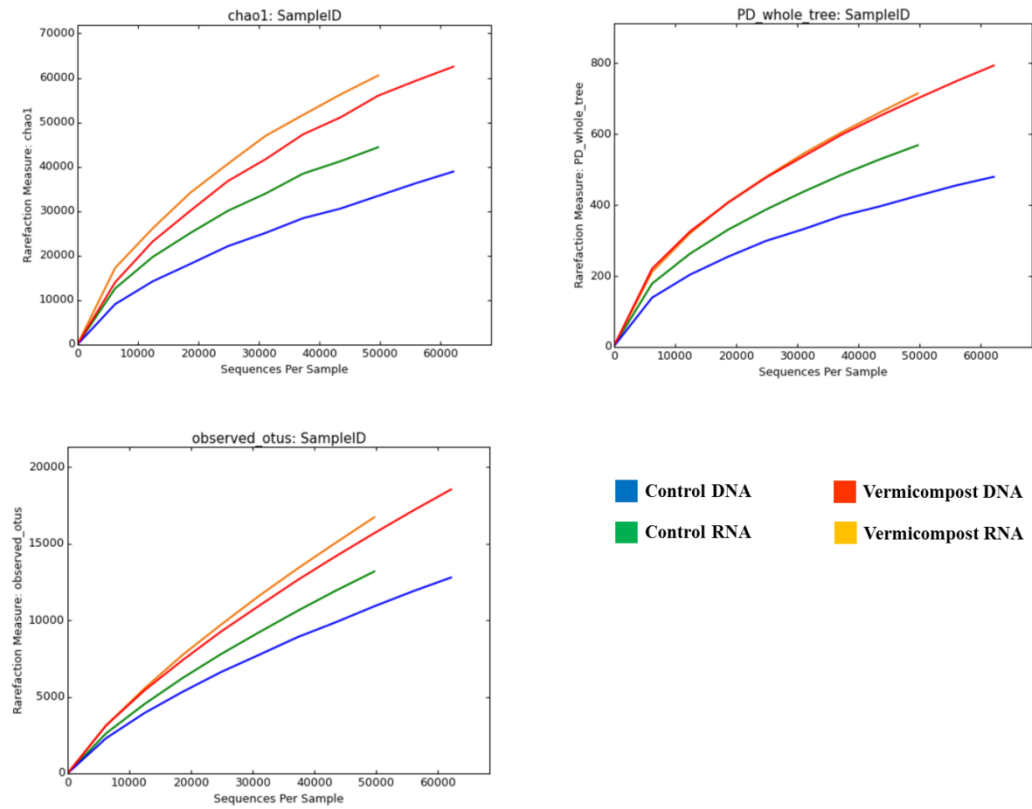

|                  | <i>Chao1</i> | PD whole tree<br>(Faith's Phylogenetic Diversity) | Observed OTUs |
|------------------|--------------|---------------------------------------------------|---------------|
| Control DNA      | 39.366       | 444                                               | 13.037        |
| Vermicompost DNA | 56.493       | 642                                               | 18.385        |
| Control RNA      | 52.217       | 593                                               | 16.140        |
| Vermicompost RNA | 64.404       | 766                                               | 26.392        |

**Supplementary Fig. 5.** Volatile blends emitted by *Nerium oleander* plants grown in a potting soil initially containing a sterile (Control)/non sterile (Vermicompost) inoculum and after attack by *Aphis nerii*.

### AROMATIC BLENDS

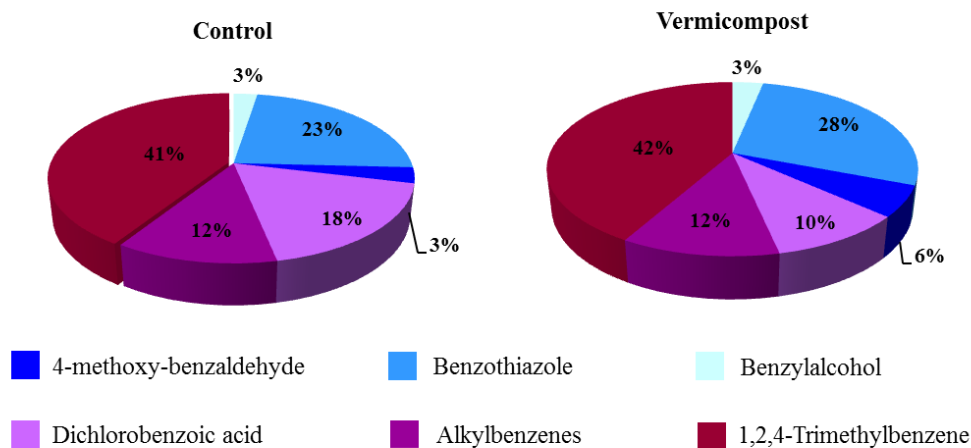

### ALIPHATIC BLENDS

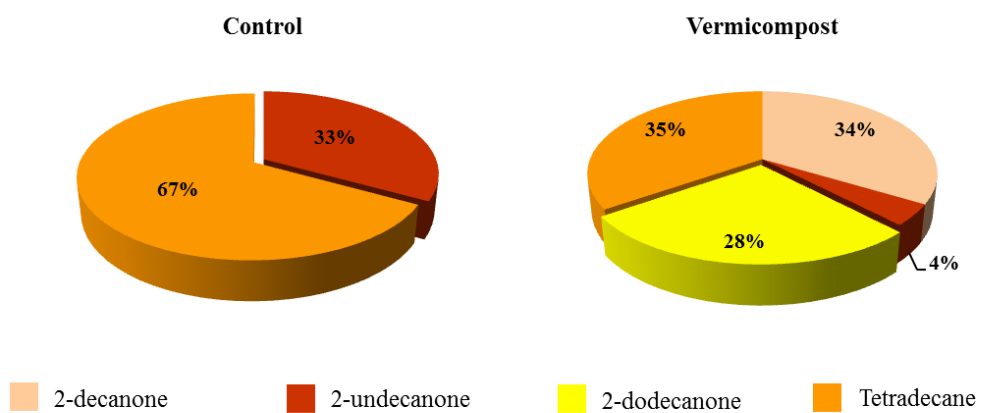

Supplement: 41598_2017_6714_MOESM1_ESM.pdf [file 41598_2017_6714_MOESM1_ESM.pdf]
